# Supplementary material for: Hollow fiber-based solid–liquid phase microextraction combined with theta capillary electrospray ionization mass spectrometry for sensitive and accurate analysis of methamphetamine
Source: Royal Society of Chemistry journal article supplement (doi:10.1039/c6ay02254e), 2016-01-01
Supplement: c6ay02254e1.pdf [file c6ay02254e1.pdf]

## Electronic Supplementary Information

### **Hollow fiber-based solid-liquid phase microextraction combined with theta capillary electrospray ionization mass spectrometry for sensitive and accurate analysis of methamphetamine**

Zhi Li <sup>1,2\*</sup>, Shuaihua Zhang <sup>2</sup>, Yi Cai <sup>1</sup>, Qiuhua Wu <sup>1,2</sup>, Chen Hao <sup>1,\*</sup>

<sup>1</sup> *Center for Intelligent Chemical Instrumentation, Department of Chemistry and  
Biochemistry, Edison Biotechnology Institute, Ohio University, Athens, OH 45701,  
USA*

<sup>2</sup> *Department of Chemistry, College of Science, Agricultural University of  
Hebei, Baoding 071001, China*

\* Corresponding author: Zhi Li and Chen Hao

Phone: +740-593-0719 (Chen Hao)

Fax: +740-597-3157 (Chen Hao)

E-mail: chenh2@ohio.edu (H. Chen), ihzil2006@126.com (Z. Li).

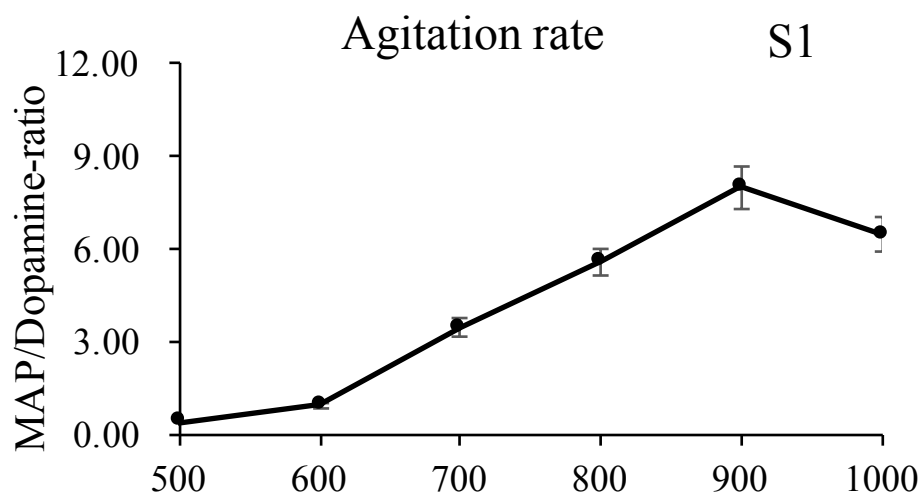

**Fig. S1** Effect of the stirring speed. The conditions were: the MAP concentration was  $1.0 \mu\text{g mL}^{-1}$ , the concentration of MOF/GO in toluene was  $3 \text{ mg mL}^{-1}$ , the extraction time was 30 min, no salt was added, pH was not adjusted, the desorption solvent was methanol with the volume of  $50 \mu\text{L}$ , the desorption time was 3 min.

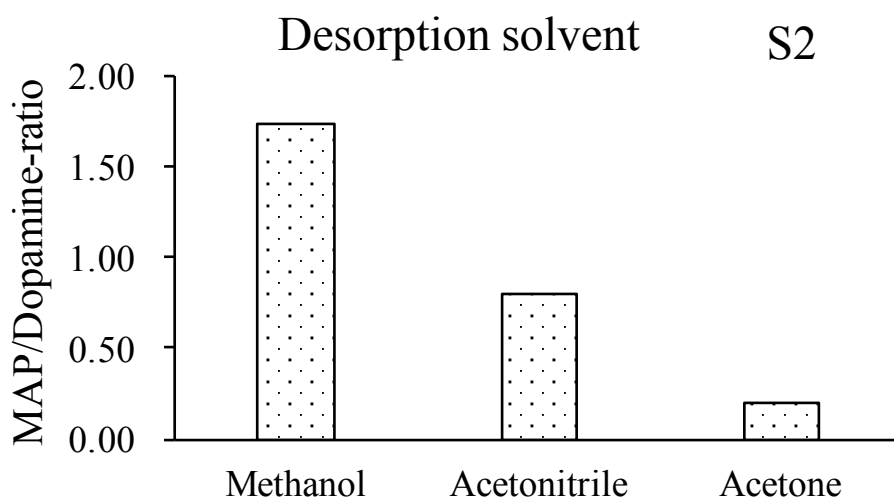

**Fig. S2** Effect of the desorption solvent. The conditions were: the MAP concentration was  $20.0 \text{ ng mL}^{-1}$ , the concentration of MOF/GO in 1-octanol was  $3 \text{ mg mL}^{-1}$ , the stirring rate was 900 rpm, pH value was 11, 30% (w/v) salt was added and the desorption time of 2 min.

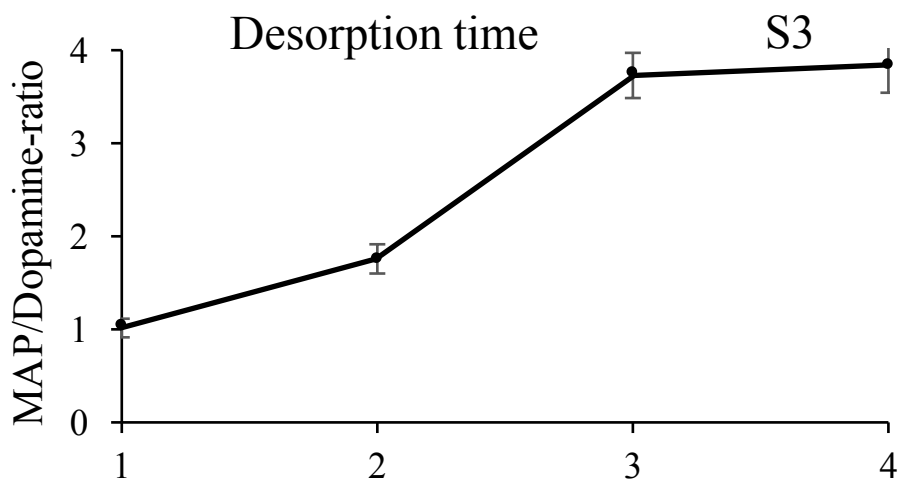

**Fig. S3** Effect of the desorption time (min). The conditions were: the MAP concentration was  $20.0 \text{ ng mL}^{-1}$ , the concentration of MOF/GO in 1-octanol was  $3 \text{ mg mL}^{-1}$ , the stirring rate was 900 rpm, pH value was 11, 30% (w/v) salt was added and the desorption solvent was methanol.

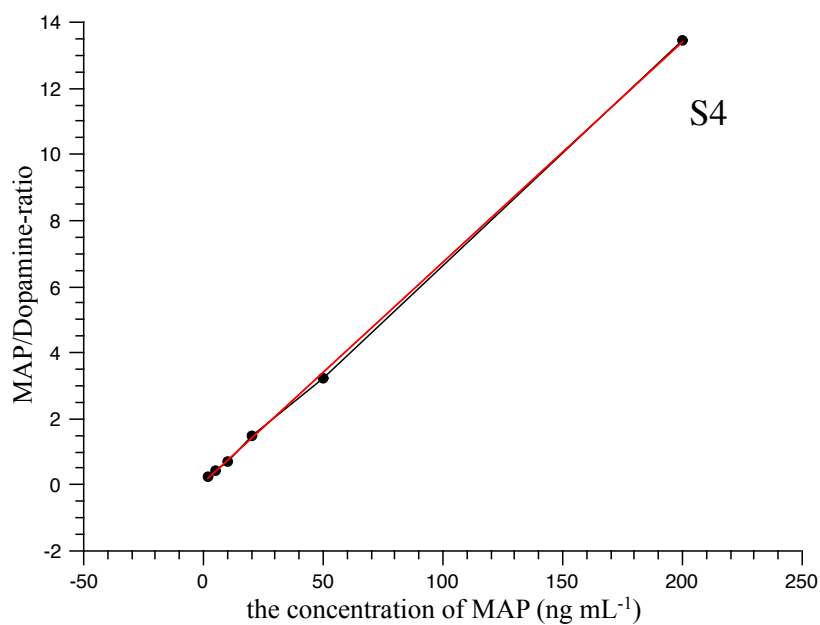

**Fig. S4** Linear relation of the intensity ratios of the signal intensities of MAP to dopamine ( $1.0 \text{ } \mu\text{g mL}^{-1}$ ).
